# Supplementary material for: Antioxidant Activity of Blueberry (Vaccinium spp.) Cultivar Leaves: Differences across the Vegetative Stage and the Application of Near Infrared Spectroscopy
Source: PubMed Central journal article supplement (PMC6864474; doi:10.3390/molecules24213900), 2019-10-29
Supplement: molecules-24-03900-s001.pdf [file molecules-24-03900-s001.pdf]

**Table S1.** Statistical data analysis for the total phenolic content (TPC) of *Vaccinium* cultivars collected in Spring, region A: Northern Coast. Red cells correspond to significantly different values ( $p < 0.05$ ) and green ones to statistically equal values ( $p > 0.05$ ).

|      | Leg | Oz | Mis | Str | Och | Dra | Bluc | Duk | Pow | One | Cha | Bluj | Cam | Gol | Tit | Hur | Aur | Lib |
|------|-----|----|-----|-----|-----|-----|------|-----|-----|-----|-----|------|-----|-----|-----|-----|-----|-----|
| Leg  |     |    |     |     |     |     |      |     |     |     |     |      |     |     |     |     |     |     |
| Oz   |     |    |     |     |     |     |      |     |     |     |     |      |     |     |     |     |     |     |
| Mis  |     |    |     |     |     |     |      |     |     |     |     |      |     |     |     |     |     |     |
| Str  |     |    |     |     |     |     |      |     |     |     |     |      |     |     |     |     |     |     |
| Och  |     |    |     |     |     |     |      |     |     |     |     |      |     |     |     |     |     |     |
| Dra  |     |    |     |     |     |     |      |     |     |     |     |      |     |     |     |     |     |     |
| Bluc |     |    |     |     |     |     |      |     |     |     |     |      |     |     |     |     |     |     |
| Duk  |     |    |     |     |     |     |      |     |     |     |     |      |     |     |     |     |     |     |
| Pow  |     |    |     |     |     |     |      |     |     |     |     |      |     |     |     |     |     |     |
| One  |     |    |     |     |     |     |      |     |     |     |     |      |     |     |     |     |     |     |
| Cha  |     |    |     |     |     |     |      |     |     |     |     |      |     |     |     |     |     |     |
| Bluj |     |    |     |     |     |     |      |     |     |     |     |      |     |     |     |     |     |     |
| Cam  |     |    |     |     |     |     |      |     |     |     |     |      |     |     |     |     |     |     |
| Gol  |     |    |     |     |     |     |      |     |     |     |     |      |     |     |     |     |     |     |
| Tit  |     |    |     |     |     |     |      |     |     |     |     |      |     |     |     |     |     |     |
| Hur  |     |    |     |     |     |     |      |     |     |     |     |      |     |     |     |     |     |     |
| Aur  |     |    |     |     |     |     |      |     |     |     |     |      |     |     |     |     |     |     |
| Lib  |     |    |     |     |     |     |      |     |     |     |     |      |     |     |     |     |     |     |

Leg: Legacy; Oz: Ozarkblue; Mis: Misty; Str: Star; Och: Ochlochonee; Dra: Drapler; Bluc: Bluecrop; Duk: Duke; Pow: Powderblue; One: O'neal; Cha: Chandler; Bluj: Bluejay; Cam: Camellia; Gol: Goldtraube; Tit: Titan; Hur: Huron; Aur: Aurora; Lib: Liberty

**Table S2.** Statistical data analysis for the total phenolic content (TPC) of *Vaccinium* cultivars collected in Fall, region A: Northern Inland. Red cells correspond to significantly different values ( $p < 0.05$ ) and green ones to statistically equal values ( $p > 0.05$ ).

|      | Leg | Oz | Mis | Och | Bluc | Duk | Cha | Cam | Gol | Tit | Hur | Aur | Lib |
|------|-----|----|-----|-----|------|-----|-----|-----|-----|-----|-----|-----|-----|
| Leg  |     |    |     |     |      |     |     |     |     |     |     |     |     |
| Oz   |     |    |     |     |      |     |     |     |     |     |     |     |     |
| Mis  |     |    |     |     |      |     |     |     |     |     |     |     |     |
| Och  |     |    |     |     |      |     |     |     |     |     |     |     |     |
| Bluc |     |    |     |     |      |     |     |     |     |     |     |     |     |
| Duk  |     |    |     |     |      |     |     |     |     |     |     |     |     |
| Cha  |     |    |     |     |      |     |     |     |     |     |     |     |     |
| Cam  |     |    |     |     |      |     |     |     |     |     |     |     |     |
| Gol  |     |    |     |     |      |     |     |     |     |     |     |     |     |
| Tit  |     |    |     |     |      |     |     |     |     |     |     |     |     |
| Hur  |     |    |     |     |      |     |     |     |     |     |     |     |     |
| Aur  |     |    |     |     |      |     |     |     |     |     |     |     |     |
| Lib  |     |    |     |     |      |     |     |     |     |     |     |     |     |

Leg: Legacy; Oz: Ozarkblue; Mis: Misty; Och: Ochlochonee; Bluc: Bluecrop; Duk: Duke; Cha: Chandler; Cam: Camellia; Gol: Goldtraube; Tit: Titan; Hur: Huron; Aur: Aurora; Lib: Liberty

**Table S3.** Statistical data analysis for the total phenolic content (TPC) of *Vaccinium* cultivars collected in Winter, region A: South Inland. Red cells correspond to significantly different values ( $p < 0.05$ ) and green ones to statistically equal values ( $p > 0.05$ ).

|      | Leg | Mis | Str | Dra   | Bluc | Duk | Pow   | One | Cha   | Cam | Gol | Tit | Hur   | Aur   | Lib   | Ell   | Pat   | Bil   |
|------|-----|-----|-----|-------|------|-----|-------|-----|-------|-----|-----|-----|-------|-------|-------|-------|-------|-------|
| Leg  | Red | Red | Red | Green | Red  | Red | Red   | Red | Red   | Red | Red | Red | Red   | Red   | Red   | Red   | Red   | Red   |
| Mis  | Red | Red | Red | Red   | Red  | Red | Red   | Red | Red   | Red | Red | Red | Red   | Red   | Green | Red   | Red   | Red   |
| Str  | Red | Red | Red | Red   | Red  | Red | Red   | Red | Red   | Red | Red | Red | Red   | Red   | Green | Red   | Red   | Red   |
| Dra  | Red | Red | Red | Red   | Red  | Red | Green | Red | Green | Red | Red | Red | Red   | Red   | Red   | Green | Red   | Red   |
| Bluc | Red | Red | Red | Red   | Red  | Red | Red   | Red | Red   | Red | Red | Red | Red   | Red   | Red   | Red   | Red   | Red   |
| Duk  | Red | Red | Red | Red   | Red  | Red | Red   | Red | Red   | Red | Red | Red | Red   | Red   | Red   | Red   | Red   | Red   |
| Pow  | Red | Red | Red | Red   | Red  | Red | Red   | Red | Red   | Red | Red | Red | Red   | Green | Red   | Red   | Red   | Red   |
| One  | Red | Red | Red | Red   | Red  | Red | Red   | Red | Red   | Red | Red | Red | Red   | Red   | Red   | Red   | Red   | Red   |
| Cha  | Red | Red | Red | Red   | Red  | Red | Red   | Red | Red   | Red | Red | Red | Green | Red   | Red   | Green | Red   | Red   |
| Cam  | Red | Red | Red | Red   | Red  | Red | Red   | Red | Red   | Red | Red | Red | Red   | Red   | Red   | Red   | Red   | Red   |
| Gol  | Red | Red | Red | Red   | Red  | Red | Red   | Red | Red   | Red | Red | Red | Red   | Red   | Red   | Red   | Green | Green |
| Tit  | Red | Red | Red | Red   | Red  | Red | Red   | Red | Red   | Red | Red | Red | Red   | Red   | Red   | Red   | Red   | Red   |
| Hur  | Red | Red | Red | Red   | Red  | Red | Red   | Red | Red   | Red | Red | Red | Red   | Red   | Red   | Red   | Red   | Red   |
| Aur  | Red | Red | Red | Red   | Red  | Red | Red   | Red | Red   | Red | Red | Red | Red   | Red   | Red   | Red   | Red   | Red   |
| Lib  | Red | Red | Red | Red   | Red  | Red | Red   | Red | Red   | Red | Red | Red | Red   | Red   | Red   | Red   | Red   | Red   |
| Ell  | Red | Red | Red | Red   | Red  | Red | Red   | Red | Red   | Red | Red | Red | Red   | Red   | Red   | Red   | Red   | Red   |
| Pat  | Red | Red | Red | Red   | Red  | Red | Red   | Red | Red   | Red | Red | Red | Red   | Red   | Red   | Red   | Red   | Green |
| Bil  | Red | Red | Red | Red   | Red  | Red | Red   | Red | Red   | Red | Red | Red | Red   | Red   | Red   | Red   | Red   | Red   |

Leg: Legacy; Mis: Misty; Str: Star; Dra: Drapler; Bluc: Bluecrop; Duk: Duke; Pow: Powderblue; One: O’neal; Cha: Chandler; Cam: Camellia; Gol: Goldtraube; Tit: Titan; Hur: Huron; Aur: Aurora; Lib: Liberty; Ell: Elliot; Pat: Patriot; Bil: Biloxi

**Table S4.** Statistical data analysis for the total phenolic content (TPC) of each *Vaccinium* cultivar collected in Spring, Fall and Winter (Region A: Northern Coast). Red cells correspond to significantly different values ( $p < 0.05$ ) and green ones to statistically equal values ( $p > 0.05$ ).

|               | Fall | Winter |
|---------------|------|--------|
| Leg (Spring)  |      |        |
| Leg (Fall)    |      |        |
| Oz (Spring)   |      | ---    |
| Oz (Fall)     |      | ---    |
| Mis (Spring)  |      |        |
| Mis (Fall)    |      |        |
| Str (Spring)  | ---  |        |
| Str (Fall)    |      | ---    |
| Och (Spring)  |      | ---    |
| Och (Fall)    |      | ---    |
| Dra (Spring)  | ---  |        |
| Dra (Fall)    |      | ---    |
| Bluc (Spring) |      |        |
| Bluc (Fall)   |      |        |
| Duk (Spring)  |      |        |
| Duk (Fall)    |      |        |
| Pow (Spring)  | ---  |        |
| Pow (Fall)    |      | ---    |

|              | Fall | Winter |
|--------------|------|--------|
| One (Spring) | ---  |        |
| One (Fall)   |      | ---    |
| Cha (Spring) |      |        |
| Cha (Fall)   |      |        |
| Cam (Spring) |      |        |
| Cam (Fall)   |      |        |
| Gol (Spring) |      |        |
| Gol (Fall)   |      |        |
| Tit (Spring) |      |        |
| Tit (Fall)   |      |        |
| Hur (Spring) |      |        |
| Hur (Fall)   |      |        |
| Aur (Spring) |      |        |
| Aur (Fall)   |      |        |
| Lib (Spring) |      |        |
| Lib (Fall)   |      |        |

Leg: Legacy; Oz: Ozarkblue; Mis: Misty; Str: Star; Och: Ochlochonee; Dra: Drapler; Bluc: Bluecrop; Duk: Duke; Pow: Powderblue; One: O’neal; Cha: Chandler; Bluj: Bluejay; Cam: Camellia; Gol: Goldtraube; Tit: Titan; Hur: Huron; Aur: Aurora; Lib: Liberty

**Table S5.** Statistical data analysis for the total phenolic content (TPC) of *Vaccinium* cultivars collected in Spring, region B: Northern Inland. Red cells correspond to significantly different values ( $p < 0.05$ ) and green ones to statistically equal values ( $p > 0.05$ ).

|      | Leg | Och | Dra | Bluc | Duk | Pow | Cha | Cam | Blug |
|------|-----|-----|-----|------|-----|-----|-----|-----|------|
| Leg  |     |     |     |      |     |     |     |     |      |
| Och  |     |     |     |      |     |     |     |     |      |
| Dra  |     |     |     |      |     |     |     |     |      |
| Bluc |     |     |     |      |     |     |     |     |      |
| Duk  |     |     |     |      |     |     |     |     |      |
| Pow  |     |     |     |      |     |     |     |     |      |
| Cha  |     |     |     |      |     |     |     |     |      |
| Cam  |     |     |     |      |     |     |     |     |      |
| Blug |     |     |     |      |     |     |     |     |      |

Leg: Legacy; Och: Ochlochonee; Dra: Drapler; Bluc: Bluecrop; Duk: Duke; Pow: Powderblue; Cha: Chandler; Cam: Camellia; Blug: Bluegold

**Table S6.** Statistical data analysis for the total phenolic content (TPC) of *Vaccinium* cultivars collected in Spring, region C: South Inland. Red cells correspond to significantly different values ( $p < 0.05$ ) and green ones to statistically equal values ( $p > 0.05$ ).

|     | Alx | Neh | Sun | Gup | Cip |
|-----|-----|-----|-----|-----|-----|
| Alx |     |     |     |     |     |
| Neh |     |     |     |     |     |
| Sun |     |     |     |     |     |
| Gup |     |     |     |     |     |
| Cip |     |     |     |     |     |

Alx: Alix blue; Neh: New hanover; Sun: Sunset blue; Gup: Gupton; Cip: Cipria

**Table S7.** Statistical data analysis for the total flavonoid content (TFC) of *Vaccinium* cultivars collected in Spring, region A: Northern Coast. Red cells correspond to significantly different values ( $p < 0.05$ ) and green ones to statistically equal values ( $p > 0.05$ ).

|      | Leg  | Oz    | Mis  | Str  | Och   | Dra   | Bluc  | Duk  | Pow   | One  | Cha  | Bluj  | Cam   | Gol   | Tit   | Hur   | Aur   | Lib   |
|------|------|-------|------|------|-------|-------|-------|------|-------|------|------|-------|-------|-------|-------|-------|-------|-------|
| Leg  | Grey | Green | Red  | Red  | Green | Green | Red   | Red  | Red   | Red  | Red  | Green | Red   | Red   | Red   | Red   | Red   | Red   |
| Oz   | Red  | Grey  | Red  | Red  | Green | Red   | Red   | Red  | Red   | Red  | Red  | Green | Red   | Red   | Red   | Red   | Red   | Red   |
| Mis  | Red  | Red   | Grey | Red  | Red   | Red   | Red   | Red  | Green | Red  | Red  | Red   | Red   | Red   | Red   | Red   | Red   | Red   |
| Str  | Red  | Red   | Red  | Grey | Red   | Red   | Red   | Red  | Red   | Red  | Red  | Red   | Red   | Red   | Red   | Green | Green | Red   |
| Och  | Red  | Red   | Red  | Red  | Grey  | Green | Red   | Red  | Red   | Red  | Red  | Green | Red   | Red   | Red   | Red   | Red   | Red   |
| Dra  | Red  | Red   | Red  | Red  | Red   | Grey  | Green | Red  | Red   | Red  | Red  | Green | Red   | Red   | Red   | Red   | Red   | Red   |
| Bluc | Red  | Red   | Red  | Red  | Red   | Red   | Grey  | Red  | Red   | Red  | Red  | Green | Red   | Red   | Red   | Red   | Red   | Red   |
| Duk  | Red  | Red   | Red  | Red  | Red   | Red   | Red   | Grey | Red   | Red  | Red  | Red   | Green | Red   | Red   | Red   | Red   | Green |
| Pow  | Red  | Red   | Red  | Red  | Red   | Red   | Red   | Red  | Grey  | Red  | Red  | Red   | Red   | Red   | Green | Red   | Red   | Red   |
| One  | Red  | Red   | Red  | Red  | Red   | Red   | Red   | Red  | Red   | Grey | Red  | Red   | Red   | Green | Red   | Red   | Red   | Red   |
| Cha  | Red  | Red   | Red  | Red  | Red   | Red   | Red   | Red  | Red   | Red  | Grey | Red   | Red   | Red   | Red   | Red   | Red   | Red   |
| Bluj | Red  | Red   | Red  | Red  | Red   | Red   | Red   | Red  | Red   | Red  | Red  | Grey  | Red   | Red   | Red   | Red   | Red   | Red   |
| Cam  | Red  | Red   | Red  | Red  | Red   | Red   | Red   | Red  | Red   | Red  | Red  | Red   | Grey  | Red   | Red   | Red   | Red   | Green |
| Gol  | Red  | Red   | Red  | Red  | Red   | Red   | Red   | Red  | Red   | Red  | Red  | Red   | Red   | Grey  | Red   | Green | Green | Red   |
| Tit  | Red  | Red   | Red  | Red  | Red   | Red   | Red   | Red  | Red   | Red  | Red  | Red   | Red   | Red   | Grey  | Red   | Red   | Red   |
| Hur  | Red  | Red   | Red  | Red  | Red   | Red   | Red   | Red  | Red   | Red  | Red  | Red   | Red   | Red   | Red   | Grey  | Green | Red   |
| Aur  | Red  | Red   | Red  | Red  | Red   | Red   | Red   | Red  | Red   | Red  | Red  | Red   | Red   | Red   | Red   | Red   | Grey  | Red   |
| Lib  | Red  | Red   | Red  | Red  | Red   | Red   | Red   | Red  | Red   | Red  | Red  | Red   | Red   | Red   | Red   | Red   | Red   | Grey  |

Leg: Legacy; Oz: Ozarkblue; Mis: Misty; Str: Star; Och: Ochlochonee; Dra: Drapler; Bluc: Bluecrop; Duk: Duke; Pow: Powderblue; One: O’neal; Cha: Chandler; Bluj: Bluejay; Cam: Camellia; Gol: Goldtraube; Tit: Titan; Hur: Huron; Aur: Aurora; Lib: Liberty

**Table S8.** Statistical data analysis for the total flavonoid content (TFC) of *Vaccinium* cultivars collected in Fall, region A: Northern Inland. Red cells correspond to significantly different values ( $p < 0.05$ ) and green ones to statistically equal values ( $p > 0.05$ ).

|      | Leg | Oz | Mis | Och | Bluc | Duk | Cha | Cam | Gol | Tit | Hur | Aur | Lib |
|------|-----|----|-----|-----|------|-----|-----|-----|-----|-----|-----|-----|-----|
| Leg  |     |    |     |     |      |     |     |     |     |     |     |     |     |
| Oz   |     |    |     |     |      |     |     |     |     |     |     |     |     |
| Mis  |     |    |     |     |      |     |     |     |     |     |     |     |     |
| Och  |     |    |     |     |      |     |     |     |     |     |     |     |     |
| Bluc |     |    |     |     |      |     |     |     |     |     |     |     |     |
| Duk  |     |    |     |     |      |     |     |     |     |     |     |     |     |
| Cha  |     |    |     |     |      |     |     |     |     |     |     |     |     |
| Cam  |     |    |     |     |      |     |     |     |     |     |     |     |     |
| Gol  |     |    |     |     |      |     |     |     |     |     |     |     |     |
| Tit  |     |    |     |     |      |     |     |     |     |     |     |     |     |
| Hur  |     |    |     |     |      |     |     |     |     |     |     |     |     |
| Aur  |     |    |     |     |      |     |     |     |     |     |     |     |     |
| Lib  |     |    |     |     |      |     |     |     |     |     |     |     |     |

Leg: Legacy; Oz: Ozarkblue; Mis: Misty; Och: Ochlochonee; Bluc: Bluecrop; Duk: Duke; Cha: Chandler; Cam: Camellia; Gol: Goldtraube; Tit: Titan; Hur: Huron; Aur: Aurora; Lib: Liberty

**Table S9.** Statistical data analysis for the total flavonoid content (TFC) of *Vaccinium* cultivars collected in Winter, region A: South Inland. Red cells correspond to significantly different values ( $p < 0.05$ ) and green ones to statistically equal values ( $p > 0.05$ ).

|      | Leg | Mis | Str | Dra | Bluc | Duk | Pow | One | Cha | Cam | Gol | Tit | Hur | Aur | Lib | Ell | Pat | Bil |
|------|-----|-----|-----|-----|------|-----|-----|-----|-----|-----|-----|-----|-----|-----|-----|-----|-----|-----|
| Leg  |     |     |     |     |      |     |     |     |     |     |     |     |     |     |     |     |     |     |
| Mis  |     |     |     |     |      |     |     |     |     |     |     |     |     |     |     |     |     |     |
| Str  |     |     |     |     |      |     |     |     |     |     |     |     |     |     |     |     |     |     |
| Dra  |     |     |     |     |      |     |     |     |     |     |     |     |     |     |     |     |     |     |
| Bluc |     |     |     |     |      |     |     |     |     |     |     |     |     |     |     |     |     |     |
| Duk  |     |     |     |     |      |     |     |     |     |     |     |     |     |     |     |     |     |     |
| Pow  |     |     |     |     |      |     |     |     |     |     |     |     |     |     |     |     |     |     |
| One  |     |     |     |     |      |     |     |     |     |     |     |     |     |     |     |     |     |     |
| Cha  |     |     |     |     |      |     |     |     |     |     |     |     |     |     |     |     |     |     |
| Cam  |     |     |     |     |      |     |     |     |     |     |     |     |     |     |     |     |     |     |
| Gol  |     |     |     |     |      |     |     |     |     |     |     |     |     |     |     |     |     |     |
| Tit  |     |     |     |     |      |     |     |     |     |     |     |     |     |     |     |     |     |     |
| Hur  |     |     |     |     |      |     |     |     |     |     |     |     |     |     |     |     |     |     |
| Aur  |     |     |     |     |      |     |     |     |     |     |     |     |     |     |     |     |     |     |
| Lib  |     |     |     |     |      |     |     |     |     |     |     |     |     |     |     |     |     |     |
| Ell  |     |     |     |     |      |     |     |     |     |     |     |     |     |     |     |     |     |     |
| Pat  |     |     |     |     |      |     |     |     |     |     |     |     |     |     |     |     |     |     |
| Bil  |     |     |     |     |      |     |     |     |     |     |     |     |     |     |     |     |     |     |

Leg: Legacy; Mis: Misty; Str: Star; Dra: Drapler; Bluc: Bluecrop; Duk: Duke; Pow: Powderblue; One: O'neal; Cha: Chandler; Cam: Camellia; Gol: Goldtraube; Tit: Titan; Hur: Huron; Aur: Aurora; Lib: Liberty; Ell: Elliot; Pat: Patriot; Bil: Biloxi

**Table S10.** Statistical data analysis for the total flavonoid content (TFC) of each *Vaccinium* cultivar collected in Spring, Fall and Winter (Region A: Northern Coast). Red cells correspond to significantly different values ( $p < 0.05$ ) and green ones to statistically equal values ( $p > 0.05$ ).

|               | Fall | Winter |
|---------------|------|--------|
| Leg (Spring)  |      |        |
| Leg (Fall)    |      |        |
| Oz (Spring)   |      | ---    |
| Oz (Fall)     |      | ---    |
| Mis (Spring)  |      |        |
| Mis (Fall)    |      |        |
| Str (Spring)  | ---  |        |
| Str (Fall)    |      | ---    |
| Och (Spring)  |      | ---    |
| Och (Fall)    |      | ---    |
| Dra (Spring)  | ---  |        |
| Dra (Fall)    |      | ---    |
| Bluc (Spring) |      |        |
| Bluc (Fall)   |      |        |
| Duk (Spring)  |      |        |
| Duk (Fall)    |      |        |
| Pow (Spring)  | ---  |        |
| Pow (Fall)    |      | ---    |

|              | Fall | Winter |
|--------------|------|--------|
| One (Spring) | ---  |        |
| One (Fall)   |      | ---    |
| Cha (Spring) |      |        |
| Cha (Fall)   |      |        |
| Cam (Spring) |      |        |
| Cam (Fall)   |      |        |
| Gol (Spring) |      |        |
| Gol (Fall)   |      |        |
| Tit (Spring) |      |        |
| Tit (Fall)   |      |        |
| Hur (Spring) |      |        |
| Hur (Fall)   |      |        |
| Aur (Spring) |      |        |
| Aur (Fall)   |      |        |
| Lib (Spring) |      |        |
| Lib (Fall)   |      |        |

Leg: Legacy; Oz: Ozarkblue; Mis: Misty; Str: Star; Och: Ochlochonee; Dra: Drapler; Bluc: Bluecrop; Duk: Duke; Pow: Powderblue; One: O’neal; Cha: Chandler; Cam: Camellia; Gol: Goldtraube; Tit: Titan; Hur: Huron; Aur: Aurora; Lib: Liberty

**Table S11.** Statistical data analysis for the total flavonoid content (TFC) of *Vaccinium* cultivars collected in Spring, region B: Northern Inland. Red cells correspond to significantly different values ( $p < 0.05$ ) and green ones to statistically equal values ( $p > 0.05$ ).

|      | Leg | Och | Dra | Bluc | Duk | Pow | Cha | Cam | Blug |
|------|-----|-----|-----|------|-----|-----|-----|-----|------|
| Leg  |     |     |     |      |     |     |     |     |      |
| Och  |     |     |     |      |     |     |     |     |      |
| Dra  |     |     |     |      |     |     |     |     |      |
| Bluc |     |     |     |      |     |     |     |     |      |
| Duk  |     |     |     |      |     |     |     |     |      |
| Pow  |     |     |     |      |     |     |     |     |      |
| Cha  |     |     |     |      |     |     |     |     |      |
| Cam  |     |     |     |      |     |     |     |     |      |
| Blug |     |     |     |      |     |     |     |     |      |

Leg: Legacy; Och: Ochlochonee; Dra: Drapler; Bluc: Bluecrop; Duk: Duke; Pow: Powderblue; Cha: Chandler; Cam: Camellia; Blug: Bluegold

**Table S12.** Statistical data analysis for the total flavonoid content (TFC) of *Vaccinium* cultivars collected in Spring, region C: South Inland. Red cells correspond to significantly different values ( $p < 0.05$ ) and green ones to statistically equal values ( $p > 0.05$ ).

|     | Alx | Neh | Sun | Gup | Cip |
|-----|-----|-----|-----|-----|-----|
| Alx |     |     |     |     |     |
| Neh |     |     |     |     |     |
| Sun |     |     |     |     |     |
| Gup |     |     |     |     |     |
| Cip |     |     |     |     |     |

Alx: Alix blue; Neh: New hanover; Sun: Sunset blue; Gup: Gupton; Cip: Cipria

**Table S13.** Statistical data analysis for the total antioxidant activity (TAC) of *Vaccinium* cultivars collected in Spring, region A: Northern Coast. Red cells correspond to significantly different values ( $p < 0.05$ ) and green ones to statistically equal values ( $p > 0.05$ ).

|      | Leg | Oz  | Mis | Str | Och   | Dra   | Bluc | Duk | Pow   | One   | Cha   | Bluj  | Cam   | Gol   | Tit   | Hur   | Aur   | Lib   |
|------|-----|-----|-----|-----|-------|-------|------|-----|-------|-------|-------|-------|-------|-------|-------|-------|-------|-------|
| Leg  | Red | Red | Red | Red | Red   | Red   | Red  | Red | Red   | Red   | Red   | Red   | Red   | Green | Red   | Red   | Green | Red   |
| Oz   | Red | Red | Red | Red | Red   | Red   | Red  | Red | Red   | Red   | Red   | Red   | Green | Green | Red   | Red   | Green | Red   |
| Mis  | Red | Red | Red | Red | Green | Green | Red  | Red | Green | Red   | Red   | Red   | Red   | Red   | Green | Red   | Red   | Green |
| Str  | Red | Red | Red | Red | Red   | Red   | Red  | Red | Red   | Red   | Red   | Red   | Red   | Green | Red   | Red   | Red   | Red   |
| Och  | Red | Red | Red | Red | Red   | Green | Red  | Red | Red   | Red   | Red   | Red   | Red   | Red   | Green | Red   | Red   | Green |
| Dra  | Red | Red | Red | Red | Red   | Red   | Red  | Red | Red   | Red   | Red   | Green | Red   | Red   | Green | Red   | Red   | Green |
| Bluc | Red | Red | Red | Red | Red   | Red   | Red  | Red | Red   | Red   | Green | Green | Red   | Red   | Red   | Red   | Green | Green |
| Duk  | Red | Red | Red | Red | Red   | Red   | Red  | Red | Red   | Green | Red   | Red   | Red   | Red   | Red   | Green | Red   | Red   |
| Pow  | Red | Red | Red | Red | Red   | Red   | Red  | Red | Red   | Red   | Red   | Red   | Red   | Red   | Red   | Red   | Red   | Green |
| One  | Red | Red | Red | Red | Red   | Red   | Red  | Red | Red   | Red   | Red   | Red   | Red   | Red   | Red   | Green | Red   | Red   |
| Cha  | Red | Red | Red | Red | Red   | Red   | Red  | Red | Red   | Red   | Red   | Red   | Red   | Red   | Red   | Red   | Red   | Green |
| Bluj | Red | Red | Red | Red | Red   | Red   | Red  | Red | Red   | Red   | Red   | Red   | Red   | Red   | Red   | Red   | Red   | Green |
| Cam  | Red | Red | Red | Red | Red   | Red   | Red  | Red | Red   | Red   | Red   | Red   | Red   | Red   | Red   | Red   | Red   | Green |
| Gol  | Red | Red | Red | Red | Red   | Red   | Red  | Red | Red   | Red   | Red   | Red   | Red   | Red   | Red   | Red   | Red   | Green |
| Tit  | Red | Red | Red | Red | Red   | Red   | Red  | Red | Red   | Red   | Red   | Red   | Red   | Red   | Red   | Red   | Red   | Green |
| Hur  | Red | Red | Red | Red | Red   | Red   | Red  | Red | Red   | Red   | Red   | Red   | Red   | Red   | Red   | Red   | Red   | Green |
| Aur  | Red | Red | Red | Red | Red   | Red   | Red  | Red | Red   | Red   | Red   | Red   | Red   | Red   | Red   | Red   | Red   | Green |
| Lib  | Red | Red | Red | Red | Red   | Red   | Red  | Red | Red   | Red   | Red   | Red   | Red   | Red   | Red   | Red   | Red   | Green |

Leg: Legacy; Oz: Ozarkblue; Mis: Misty; Str: Star; Och: Ochlochonee; Dra: Drapler; Bluc: Bluecrop; Duk: Duke; Pow: Powderblue; One: O’neal; Cha: Chandler; Bluj: Bluejay; Cam: Camellia; Gol: Goldtraube; Tit: Titan; Hur: Huron; Aur: Aurora; Lib: Liberty

**Table S14.** Statistical data analysis for the total antioxidant activity (TAC) of *Vaccinium* cultivars collected in Fall, region A: Northern Inland. Red cells correspond to significantly different values ( $p < 0.05$ ) and green ones to statistically equal values ( $p > 0.05$ ).

|      | Leg | Oz | Mis | Och | Bluc | Duk | Cha | Cam | Gol | Tit | Hur | Aur | Lib |
|------|-----|----|-----|-----|------|-----|-----|-----|-----|-----|-----|-----|-----|
| Leg  |     |    |     |     |      |     |     |     |     |     |     |     |     |
| Oz   |     |    |     |     |      |     |     |     |     |     |     |     |     |
| Mis  |     |    |     |     |      |     |     |     |     |     |     |     |     |
| Och  |     |    |     |     |      |     |     |     |     |     |     |     |     |
| Bluc |     |    |     |     |      |     |     |     |     |     |     |     |     |
| Duk  |     |    |     |     |      |     |     |     |     |     |     |     |     |
| Cha  |     |    |     |     |      |     |     |     |     |     |     |     |     |
| Cam  |     |    |     |     |      |     |     |     |     |     |     |     |     |
| Gol  |     |    |     |     |      |     |     |     |     |     |     |     |     |
| Tit  |     |    |     |     |      |     |     |     |     |     |     |     |     |
| Hur  |     |    |     |     |      |     |     |     |     |     |     |     |     |
| Aur  |     |    |     |     |      |     |     |     |     |     |     |     |     |
| Lib  |     |    |     |     |      |     |     |     |     |     |     |     |     |

Leg: Legacy; Oz: Ozarkblue; Mis: Misty; Och: Ochlochonee; Bluc: Bluecrop; Duk: Duke; Cha: Chandler; Cam: Camellia; Gol: Goldtraube; Tit: Titan; Hur: Huron; Aur: Aurora; Lib: Liberty

**Table S15.** Statistical data analysis for the total antioxidant activity (TAC) of *Vaccinium* cultivars collected in Winter, region A: South Inland. Red cells correspond to significantly different values ( $p < 0.05$ ) and green ones to statistically equal values ( $p > 0.05$ ).

|      | Leg | Mis | Str | Dra | Bluc | Duk   | Pow | One | Cha   | Cam   | Gol   | Tit | Hur   | Aur   | Lib   | Ell | Pat   | Bil   |
|------|-----|-----|-----|-----|------|-------|-----|-----|-------|-------|-------|-----|-------|-------|-------|-----|-------|-------|
| Leg  | Red | Red | Red | Red | Red  | Red   | Red | Red | Red   | Red   | Red   | Red | Red   | Red   | Red   | Red | Red   | Red   |
| Mis  | Red | Red | Red | Red | Red  | Red   | Red | Red | Red   | Red   | Green | Red | Red   | Red   | Green | Red | Red   | Red   |
| Str  | Red | Red | Red | Red | Red  | Red   | Red | Red | Red   | Red   | Red   | Red | Red   | Red   | Red   | Red | Red   | Red   |
| Dra  | Red | Red | Red | Red | Red  | Red   | Red | Red | Green | Red   | Red   | Red | Green | Red   | Red   | Red | Red   | Red   |
| Bluc | Red | Red | Red | Red | Red  | Green | Red | Red | Red   | Green | Red   | Red | Red   | Red   | Red   | Red | Green | Green |
| Duk  | Red | Red | Red | Red | Red  | Red   | Red | Red | Red   | Green | Red   | Red | Red   | Red   | Red   | Red | Red   | Green |
| Pow  | Red | Red | Red | Red | Red  | Red   | Red | Red | Red   | Red   | Red   | Red | Green | Green | Red   | Red | Red   | Red   |
| One  | Red | Red | Red | Red | Red  | Red   | Red | Red | Red   | Red   | Red   | Red | Red   | Red   | Red   | Red | Green | Red   |
| Cha  | Red | Red | Red | Red | Red  | Red   | Red | Red | Red   | Red   | Red   | Red | Red   | Red   | Red   | Red | Red   | Red   |
| Cam  | Red | Red | Red | Red | Red  | Red   | Red | Red | Red   | Red   | Red   | Red | Red   | Red   | Red   | Red | Green | Green |
| Gol  | Red | Red | Red | Red | Red  | Red   | Red | Red | Red   | Red   | Red   | Red | Red   | Red   | Green | Red | Red   | Red   |
| Tit  | Red | Red | Red | Red | Red  | Red   | Red | Red | Red   | Red   | Red   | Red | Red   | Red   | Red   | Red | Red   | Red   |
| Hur  | Red | Red | Red | Red | Red  | Red   | Red | Red | Red   | Red   | Red   | Red | Red   | Red   | Red   | Red | Red   | Red   |
| Aur  | Red | Red | Red | Red | Red  | Red   | Red | Red | Red   | Red   | Red   | Red | Red   | Red   | Red   | Red | Red   | Red   |
| Lib  | Red | Red | Red | Red | Red  | Red   | Red | Red | Red   | Red   | Red   | Red | Red   | Red   | Red   | Red | Red   | Red   |
| Ell  | Red | Red | Red | Red | Red  | Red   | Red | Red | Red   | Red   | Red   | Red | Red   | Red   | Red   | Red | Red   | Red   |
| Pat  | Red | Red | Red | Red | Red  | Red   | Red | Red | Red   | Red   | Red   | Red | Red   | Red   | Red   | Red | Red   | Green |
| Bil  | Red | Red | Red | Red | Red  | Red   | Red | Red | Red   | Red   | Red   | Red | Red   | Red   | Red   | Red | Red   | Red   |

Leg: Legacy; Mis: Misty; Str: Star; Dra: Drapler; Bluc: Bluecrop; Duk: Duke; Pow: Powderblue; One: O’neal; Cha: Chandler; Cam: Camellia; Gol: Goldtraube; Tit: Titan; Hur: Huron; Aur: Aurora; Lib: Liberty; Ell: Elliot; Pat: Patriot; Bil: Biloxi

**Table S16.** Statistical data analysis for the total antioxidant activity (TAC) of each *Vaccinium* cultivar collected in Spring, Fall and Winter (Region A: Northern Coast). Red cells correspond to significantly different values ( $p < 0.05$ ) and green ones to statistically equal values ( $p > 0.05$ ).

|               | Fall | Winter |
|---------------|------|--------|
| Leg (Spring)  |      |        |
| Leg (Fall)    |      |        |
| Oz (Spring)   |      | ---    |
| Oz (Fall)     |      | ---    |
| Mis (Spring)  |      |        |
| Mis (Fall)    |      |        |
| Str (Spring)  | ---  |        |
| Str (Fall)    |      | ---    |
| Och (Spring)  |      | ---    |
| Och (Fall)    |      | ---    |
| Dra (Spring)  | ---  |        |
| Dra (Fall)    |      | ---    |
| Bluc (Spring) |      |        |
| Bluc (Fall)   |      |        |
| Duk (Spring)  |      |        |
| Duk (Fall)    |      |        |
| Pow (Spring)  | ---  |        |
| Pow (Fall)    |      | ---    |

|              | Fall | Winter |
|--------------|------|--------|
| One (Spring) | ---  |        |
| One (Fall)   |      | ---    |
| Cha (Spring) |      |        |
| Cha (Fall)   |      |        |
| Cam (Spring) |      |        |
| Cam (Fall)   |      |        |
| Gol (Spring) |      |        |
| Gol (Fall)   |      |        |
| Tit (Spring) |      |        |
| Tit (Fall)   |      |        |
| Hur (Spring) |      |        |
| Hur (Fall)   |      |        |
| Aur (Spring) |      |        |
| Aur (Fall)   |      |        |
| Lib (Spring) |      |        |
| Lib (Fall)   |      |        |

Leg: Legacy; Oz: Ozarkblue; Mis: Misty; Str: Star; Och: Ochlochonee; Dra: Drapler; Bluc: Bluecrop; Duk: Duke; Pow: Powderblue; One: O’neal; Cha: Chandler; Cam: Camellia; Gol: Goldtraube; Tit: Titan; Hur: Huron; Aur: Aurora; Lib: Liberty

**Table S17.** Statistical data analysis for the total antioxidant activity (TAC) of *Vaccinium* cultivars collected in Spring, region B: Northern Inland. Red cells correspond to significantly different values ( $p < 0.05$ ) and green ones to statistically equal values ( $p > 0.05$ ).

|      | Leg | Och | Dra | Bluc | Duk | Pow | Cha | Cam | Blug |
|------|-----|-----|-----|------|-----|-----|-----|-----|------|
| Leg  |     |     |     |      |     |     |     |     |      |
| Och  |     |     |     |      |     |     |     |     |      |
| Dra  |     |     |     |      |     |     |     |     |      |
| Bluc |     |     |     |      |     |     |     |     |      |
| Duk  |     |     |     |      |     |     |     |     |      |
| Pow  |     |     |     |      |     |     |     |     |      |
| Cha  |     |     |     |      |     |     |     |     |      |
| Cam  |     |     |     |      |     |     |     |     |      |
| Blug |     |     |     |      |     |     |     |     |      |

Leg: Legacy; Och: Ochlochonee; Dra: Drapler; Bluc: Bluecrop; Duk: Duke; Pow: Powderblue; Cha: Chandler; Cam: Camellia; Blug: Bluegold

**Table S18.** Statistical data analysis for the total antioxidant activity (TAC) of *Vaccinium* cultivars collected in Spring, region C: South Inland. Red cells correspond to significantly different values ( $p < 0.05$ ) and green ones to statistically equal values ( $p > 0.05$ ).

|     | Alx | Neh | Sun | Gup | Cip |
|-----|-----|-----|-----|-----|-----|
| Alx |     |     |     |     |     |
| Neh |     |     |     |     |     |
| Sun |     |     |     |     |     |
| Gup |     |     |     |     |     |
| Cip |     |     |     |     |     |

Alx: Alix blue; Neh: New hanover; Sun: Sunset blue; Gup: Gupton; Cip: Cipria
